# Supplementary material
Source: HighWire-hosted journal article supplement (https://www.cmajopen.ca/highwire/filestream/80972/field_highwire_adjunct_files/1/open-2016-0036-original-submission.pdf)
Supplement: open-2016-0036-original-submission.pdf [file open-2016-0036-original-submission.pdf]

## Cancer Incidence Attributable to Red and Processed Meat Consumption in Alberta, Canada in 2012

Anne Grundy PhD<sup>1</sup>, Abbey E. Poirier MSc<sup>1</sup>, Farah Khandwala MSc<sup>1</sup>, Alison McFadden BSc<sup>1</sup>, Christine M. Friedenreich PhD<sup>1,2,3</sup>, Darren R. Brenner PhD<sup>1,2,3\*</sup>

### Affiliations:

1. Department of Cancer Epidemiology and Prevention Research, CancerControl Alberta, Alberta Health Services
2. Department of Oncology, Cumming School of Medicine, University of Calgary
3. Department of Community Health Sciences, Cumming School of Medicine, University of Calgary

\*To Whom Correspondence should be addressed.

Department of Cancer Epidemiology and Prevention Research  
CancerControl Alberta, Alberta Health Services  
Holy Cross Centre – Room 513C  
Box ACB, 2210 – 2<sup>nd</sup> St. SW.  
Calgary, Alberta  
T2S 3C3  
[Darren.Brenner@albertahealthservices.ca](mailto:Darren.Brenner@albertahealthservices.ca)

**Running Title:** Cancer Attributable to Red and Processed Meat

**ABSTRACT**

**Background:** Red and processed meat consumption has been associated with an increased risk of colorectal cancer. The purpose of this study was to quantify the proportion and absolute number of cancers in Alberta that could be attributed to red and processed meat consumption in 2012.

**Methods:** The number and proportion of colorectal cancers in Alberta attributable to red and processed meat consumption were estimated using the population attributable risk.. Relative risks were obtained from the World Cancer Research Fund's 2011 Continuous Update Project on colorectal cancer and the prevalence of red and processed meat consumption was estimated using dietary data from Alberta's Tomorrow Project cohort. Age and sex specific colorectal cancer incidence data for 2012 were obtained from the Alberta Cancer Registry.

**Results:** Among Tomorrow Project participants 41 - 61% of men and 14 - 25% of women consumed more than 500g of red and processed meat per week, exceeding World Cancer Research Fund cancer prevention guidelines. Population attributable risks for colorectal cancer were substantially higher in men (13.6-17.9%) than in women (1.6- 2.1%) for red meat consumption. For processed meat consumption the population attributable risk was also higher among men (3.2-4.8%) than women (1.5-2.1%). Overall approximately 12% of colorectal cancers or 1.5% of all cancers in Alberta in 2012 were attributable to red and processed meat consumption.

**Interpretation:** With an estimated population attributable risk of approximately 12%, decreasing red and processed meat consumption in Alberta has the potential to reduce to the provincial burden of colorectal cancer.

## INTRODUCTION

This manuscript is the sixth in a series of exposure-specific manuscripts concerning the proportion of cancer attributable to modifiable lifestyle and environmental risk factors in the general population of Alberta. The methodologic framework for this series methods has been previously described.[1]

In 2007 the World Cancer Research Fund determined there was a ‘convincing increased risk’ for colorectal cancer associated with both red and processed meat consumption on the basis of data from both case-control and cohort studies that provided evidence of a dose-response relationship.[2] In 2011 the World Cancer Research Fund’s Continuous Update Project evaluated updated evidence concerning this relationship and confirmed the 2007 classification.[3] The World Cancer Research Fund recommends limiting red meat consumption to ‘less than 500g (18oz) per week, with very little if any to be processed’ for the purposes of cancer prevention.[2] Most recently, in October of 2015, the International Agency for Research on Cancer classified processed meat consumption as a Group 1 carcinogen and red meat consumption as a Group 2 (probable) carcinogen as part of their Monograph program.[4]

Previous analyses from the United Kingdom estimated that 21.1% of colorectal cancers or 2.7% of all cancers in 2010 could be attributed to red and processed meat consumption.[5] However, to our knowledge, no similar estimates exist for Canada or more specifically, Alberta. Given that red and processed meat consumption is a modifiable cancer risk factor, understanding the burden of cancer in Alberta attributable to this dietary characteristic will provide useful information concerning the potential impact of changes in dietary patterns among Albertans with respect to cancer. Thus, the objective of this study was to quantify the proportion and absolute number of colorectal cancer cases in Alberta that could be attributed to red and processed meat consumption in 2012.

## METHODS

An adaptation of the method used by Parkin [5] was used to estimate the population attributable risks for both red and processed meat with respect to colorectal cancer (as well as colon and rectal cancer individually) in Alberta. Information on consumption of both red and processed meat was obtained from data from Alberta's Tomorrow Project.[6] The Tomorrow Project is a population-based cohort study conducted in Alberta, Canada [6] and collection of the data used in the current analysis occurred between 2000 and 2009. Participation in Alberta's Tomorrow Project cohort involved completing a baseline study questionnaire and three months after enrollment into the study, participants completed a diet history questionnaire composed of a cognitive-based food-frequency questionnaire developed by the United States National Cancer Institute as a tool to assess diet over the preceding 12 months.[6] Alberta's Tomorrow Project variables taken from this questionnaire estimated the number of ounces of each of red (beef, pork, lamb, veal, venison, liver etc.) and processed (cold cuts, sausage, ham, hot dogs) meat consumed each day. These values were converted to grams per day for analysis. Overall, red and processed meat consumption was divided into deciles and the mean level of consumption, along with the proportion of the population in each decile was calculated for men and women in four age groups (35 – 44, 45 – 54, 55 – 64, ≥65 years), as shown in Tables 1 and 2.

The relative risks for colorectal cancer, as well as colon and rectal cancer individually, with respect to red and processed meat consumption were obtained from the World Cancer Research Fund's 2011 Continuous Update Project on Colon Cancer.[3] As in Parkin's analysis [5], the assumption was made that the increase in risk for both of these exposures was logarithmic relative to meat intake and as such, the risk per gram of meat intake was estimated using equation 1:

$$\text{Equation 1: Risk per gram} = \frac{\ln(RR_x)}{x}$$

where  $x$  represents the exposure level in grams per day of the original relative risk. These values are summarized in Table 3.

As has been previously described [1], we considered the theoretical latency period to be the time between initiation of exposure and cancer diagnosis and the measured latency period to be the time between exposure measurement and cancer diagnosis. For the analyses concerning red and processed meat described in this paper, we attempted to quantify the measured latency period from existing high-quality cohort studies and subsequently refer to this simply as the latency period. This process revealed that average follow-up times between meat consumption and colorectal cancer incidence were between 10 and 14 years in previously conducted high-quality cohort studies.[7-9] However, data on meat consumption in Alberta was only available from Tomorrow Project data, collected between 2000 and 2009, such that at 8 years the average latency period examined in this analysis is slightly shorter than that suggested by cohort studies in the literature.

To estimate population attributable risks, the relative risk of meat consumption in each of the ten consumption categories was estimated according to equation 2:

$$\text{Equation 2: } RR_x = \exp(R_g \times G_x)$$

where  $R_g$  represents the risk per gram of meat consumption as shown in Table 3 and  $G_x$  represents the consumption of meat per day in consumption category  $x$ , as shown in Table 1 for red meat and Table 2 for processed meat. Population attributable risks were then estimated within each age-sex group according to equation 3:

$$\text{Equation 3: } PAR = \frac{\sum(p_x \times ERR_x)}{1 + \sum(p_x \times ERR_x)}$$

where  $p_x$  represents the proportion of the population in consumption category  $x$  as shown in Tables 1 and 2, while  $ERR_x$  represents the excess relative risk in consumption category  $x$ , calculated as  $RR_x - 1$ . To estimate the total number of cancers at each site overall and by age-group and gender attributable to red and processed meat consumption, population attributable risks were applied to cancer incidence data obtained from the Alberta Cancer Registry for 2012.

To estimate 95% confidence intervals related to population attributable risk estimates, Monte Carlo simulation methods were used wherein the relative risk estimates were drawn from a log normal

1  
2  
3 distribution, prevalence estimates were drawn from a binomial distribution, and incidence estimates were  
4  
5 drawn from a Poisson distribution. Parameters for the distributions were defined by reported point  
6  
7 estimates and confidence intervals. 10,000 samples were drawn and the 2.5th and 97.5th percentiles of the  
8  
9 resulting population attributable risk distribution used as the lower and upper limits of a 95 % confidence  
10  
11 interval. Similar techniques were used by two previous studies that estimated population attributable  
12  
13 risk.[10, 11] Wherever possible and appropriate, these estimations were performed for individual sex and  
14  
15 age groups.  
16  
17  
18  
19

## 20 21 **RESULTS**

22  
23 The World Cancer Research Fund recommends consumption of less than 500g per week of red  
24  
25 meat, with little of this in a processed form.[2] Among Alberta's Tomorrow Project cohort participants,  
26  
27 levels of red and processed meat consumption were substantially higher among men than women in all age  
28  
29 groups, although consumption did appear to decrease with age in both genders (Figure 1). The proportions  
30  
31 of individuals consuming >500g/week of red and processed meat were highest amongst 35 – 44 year olds  
32  
33 (men: 61%, women: 25%) and lowest among individuals aged 65 and greater (men: 41%, women: 14%).  
34  
35

36 The higher prevalence of red and processed meat consumption among men compared to women  
37  
38 translated to elevated estimates of population attributable risk among men, particularly for red meat  
39  
40 (Tables 4 and 5). Among men, population attributable risks for colorectal cancer related to red meat  
41  
42 consumption ranged from 13.6% to 17.9% across age groups, where comparable estimates among women  
43  
44 ranged from 1.6% to 2.1% (Table 4). When colon and rectal cancers were considered separately, for both  
45  
46 men and women population attributable risk estimates were consistently higher for rectal cancer (Table 4).  
47  
48 Differences between men and women were less pronounced when considering population attributable risks  
49  
50 associated with processed meat consumption (Table 5), although estimated population attributable risk  
51  
52 values remained higher among men (range 3.2% to 4.2%) than among women (range 1.5% to 2.1%) for  
53  
54 colorectal cancer. In contrast to the pattern observed for red meat, when colon and rectal cancers were  
55  
56  
57  
58  
59  
60

1  
2  
3 considered separately, estimated population attributable risk values were higher for colon compared to  
4  
5  
6  
7  
8  
9  
10  
11  
12  
13  
14  
15  
16  
17  
18  
19  
20  
21  
22  
23  
24  
25  
26  
27  
28  
29  
30  
31  
32  
33  
34  
35  
36  
37  
38  
39  
40  
41  
42  
43  
44  
45  
46  
47  
48  
49  
50  
51  
52  
53  
54  
55  
56  
57  
58  
59  
60

considered separately, estimated population attributable risk values were higher for colon compared to  
rectal cancer for both men and women (Table 5).

Overall 9.5% of colorectal cancers were attributable to red meat consumption and 5.9% to  
processed meat consumption (Table 6). This translates to 181 excess colorectal cancer cases due to red  
meat consumption and 54 excess cases due to processed meat consumption. There were substantial  
differences in the number of excess colorectal cancer cases for men and women, where among men 166  
excess cases were due to red meat consumption and 41 excess cases due to processed meat consumption,  
while comparable values for women were 15 excess cases attributable to red meat consumption and 13  
cases attributable to processed meat consumption (Table 6). Overall we estimate that 1.1% of all cancers in  
Alberta can be attributed to red meat consumption and 0.3% to processed meat consumption.

## DISCUSSION

Overall 181 colorectal cancer cases were attributable to red meat consumption and 54 to processed  
meat consumption, which corresponds to approximately 1.5% of all cancers in Alberta. The most  
comparable previous estimate of population attributable risk for colorectal cancer related to red and  
processed meat consumption was that completed by Parkin for cancer in the United Kingdom in 2010.[5]

Parkin's analysis estimated that 3.5% of cancers in men and 1.9% of cancers in women (2.7%  
overall) diagnosed in the United Kingdom in 2010 could be attributed to red and processed meat  
consumption.[5] These estimates are substantially higher than those we estimated for cancer in Alberta and  
there are several possible explanations for these differences. First, the reported levels of meat consumption  
among Tomorrow Project participants in Alberta are substantially lower than those reported in the United  
Kingdom in Parkin's analysis.[5] These differences could reflect real differences in meat consumption  
between Alberta and the United Kingdom, but could also be the result of differences in the populations in  
which the dietary data were measured in the two studies. In Parkin's analysis, data on red and processed  
meat consumption were obtained from the National Diet and Nutrition Survey, a cross-sectional population  
survey designed to be representative of all four countries in the United Kingdom and Parkin included data

1  
2  
3 from ages 19 - 64.[5, 12] In contrast, our analysis used Alberta's Tomorrow Project data which only  
4 included individuals aged 35 and older. Given that in the United Kingdom data the mean red and processed  
5 meat consumption levels were highest for individuals aged 19 – 34, particularly in men, the exclusion of  
6 younger individuals in our analysis could have led to underestimates of overall levels of meat consumption  
7 in Alberta and thus partially account for observed differences in estimated Population Attributable Risks.  
8  
9  
10  
11  
12  
13

### 14 **Limitations**

15  
16 In addition to including only individuals over the age of 35, participants in Alberta's Tomorrow  
17 Project are volunteers, such that the ability of the participants in this cohort to accurately represent red and  
18 processed meat consumption levels in Alberta needs to be considered. Specifically, while Tomorrow  
19 Project participants are geographically representative of the province of Alberta, there may be differences  
20 in dietary patterns between participants and non-participants, presenting a risk of volunteer bias. For  
21 example, if individuals who eat more red and processed meats systematically chose not to enroll in the  
22 cohort, consumption levels estimated in Tomorrow Project data would represent an underestimate of true  
23 consumption levels in Alberta. Data published by Cancer Care Ontario from the Canadian Health  
24 Measures Survey estimated that the proportions of both men and women exceeding the 500 g/week  
25 guideline for red and processed meat consumption were much lower in Canada as a whole than as  
26 estimated for Alberta's Tomorrow Project participants.[13] This could indicate that Albertans consume  
27 much more red and processed meats than the general Canadian population, or could be due to differences  
28 in the techniques used to quantify consumption across these two surveys. Where dietary data for Alberta's  
29 Tomorrow Project participants were obtained from a food-frequency questionnaire and intake of red and  
30 processed meat in grams per day was converted to grams per week, the Canadian Health Measures Survey  
31 used three questions on the number of times per year that individuals consumed different types of red and  
32 processed meat with the total number of times per year converted to times per week, where one occasion  
33 of consumption was considered as one serving or 75g.[13] As such, estimates of red and processed meat  
34 consumption from Tomorrow Project and Canadian Health Measures Survey data are not directly  
35 comparable and Canadian Health Measures Survey data cannot be used to reasonably examine the  
36  
37  
38  
39  
40  
41  
42  
43  
44  
45  
46  
47  
48  
49  
50  
51  
52  
53  
54  
55  
56  
57  
58  
59  
60



1  
2  
3 potential for either over or under estimation of red and processed meat consumption in Alberta's  
4  
5 Tomorrow Project.  
6

7  
8 Our population attributable risk estimates represent the first such estimates for Alberta, making our  
9 contribution novel. As well, the use of 95% confidence intervals around our population attributable risk  
10 estimates to quantify the precision of these estimates is a strength of our analysis, particularly in  
11 comparison to other similar studies that have not estimated 95% confidence intervals.[5] However, these  
12 95% confidence intervals also highlight the lack of precision around our population attributable risk  
13 estimates (Tables 4 and 5). Specifically, while we estimate that 181 cases of colorectal cancer are  
14 attributable to red meat consumption, this estimate could range from 0 to 759. Similarly, for processed  
15 meat, while we estimate 54 colorectal cancer cases are attributable to processed meat consumption, this  
16 estimate could range from 0 to 157. These upper estimates would correspond to up to 4.8% of cancers  
17 attributable to red meat consumption and 1.0% to processed meat consumption. As such, the lack of  
18 precision of our population attributable risk estimates is a limitation of this analysis and should be  
19 considered when interpreting the proportion of colorectal cancers in Alberta attributable to red and  
20 processed meat consumption.  
21  
22  
23  
24  
25  
26  
27  
28  
29  
30  
31  
32  
33  
34

### 35 36 **Conclusions**

37  
38 Overall red and processed meat consumption account for just over 12% of cases of colorectal  
39 cancer and around 1.5% of all cancers in Alberta. Further, about half of the men and a quarter of the  
40 women participating in Alberta's Tomorrow Project cohort exceed the World Cancer Research Fund's  
41 500g/week recommendation for red and processed meat consumption.[2] If the consumption levels  
42 reported among Alberta's Tomorrow Project participants are representative of Alberta as a whole, reducing  
43 red and processed meat consumption in the Alberta population could reduce the incidence of colorectal  
44 cancer, one of the most common cancer types in Alberta.  
45  
46  
47  
48  
49  
50  
51  
52  
53  
54  
55  
56  
57  
58  
59  
60

## ACKNOWLEDGEMENTS

This project was funded by the Alberta Cancer Prevention Legacy Fund. Dr Christine Friedenreich is supported by an Alberta Innovates-Health Solutions Health Senior Scholar Award and the Alberta Cancer Foundation Weekend to End Women's Cancers Breast Cancer Chair at the University of Calgary. Dr. Darren Brenner is supported by a Career Development Award in Prevention from the Canadian Cancer Society Research Institute. We gratefully acknowledge Dr. Laura McDougall from the Alberta Cancer Prevention Legacy Fund for her support and guidance. We also thank Bethany Kaposhi and Lorraine Shack from the Alberta Cancer Registry for providing cancer incidence data. We are grateful for access to data from the Alberta's Tomorrow Project. Alberta's Tomorrow Project is only possible due to the commitment of its research participants, its staff and its funders: Alberta Cancer Foundation, Canadian Partnership Against Cancer, Alberta Cancer Prevention Legacy Fund (administered by Alberta Innovates – Health Solutions) and substantial in kind funding from Alberta Health Services. The views expressed herein represent the views of the author(s) and not of Alberta's Tomorrow Project or any of its funders.

## REFERENCES

1. Grundy A, Frienenreich CM, Poirier AE, Brenner DR. The number of cancers attributable to lifestyle and environment in Alberta, Canada: methods and series overview. *CMAJ Open*. 2016;Under review.
2. Research WCRFAIfC. Food, Nutrition, Physical Activity, and the Prevention of Cancer: a Global Perspective. Washington, DC: AICR, 2007.
3. Research WCRFAIfC. Continuous Update Project Report. Food, Nutrition, Physical Activity, and the Prevention of Colorectal Cancer. 2011.
4. Bouvard V, Loomis D, Guyton KZ, Grosse Y, Ghissassi FE, Benbrahim-Tallaa L, et al. Carcinogenicity of consumption of red and processed meat. *The Lancet Oncology*. 2015;16(16):1599-600.
5. Parkin DM. 5. Cancers attributable to dietary factors in the UK in 2010. *Br J Cancer*. 2011;105(s2):s24-S6.
6. Bryant H, Robson PJ, Ullman R, Freidenreich C, Dawe U. Population-based cohort development in Alberta, Canada: a feasibility study. *Chronic Diseases in Canada*. 2006;27(2):51 - 9.
7. Ruder EH, Thiebaut AC, Thompson FE, Potischman N, Subar AF, Park Y, et al. Adolescent and mid-life diet: risk of colorectal cancer in the NIH-AARP Diet and Health Study. *Am J Clin Nutr*. 2011;94(6):1607-19.
8. Ollberding NJ, Wilkens LR, Henderson BE, Kolonel LN, Le Marchand L. Meat consumption, heterocyclic amines and colorectal cancer risk: The Multiethnic Cohort Study. *International Journal of Cancer*. 2012;131(7):E1125-E33.
9. Egeberg R, Olsen A, Christensen J, Halkjaer J, Jakobsen MU, Overvad K, et al. Associations between red meat and risks for colon and rectal cancer depend on the type of red meat consumed. *J Nutr*. 2013;143(4):464-72.
10. Renehan AG, Soerjomataram I, Tyson M, Egger M, Zwahlen M, Coebergh JW, et al. Incident cancer burden attributable to excess body mass index in 30 European countries. *International journal of cancer Journal international du cancer*. 2010;126(3):692-702.
11. Lee IM, Shiroma EJ, Lobelo F, Puska P, Blair SN, Katzmarzyk PT. Effect of physical inactivity on major non-communicable diseases worldwide: an analysis of burden of disease and life expectancy. *The Lancet*. 2012;380(9838):219-29.
12. Agency FS. National Diet and Nutrition Survey. Available from: <http://tna.europarchive.org/20110116113217/http://www.food.gov.uk/science/dietarysurveys/ndnsdocuments/>.
13. Cancer Care Ontario. Cancer Risk Factors in Ontario: Healthy Weight, Healthy Eating and Active Living. Toronto, Ontario: Cancer Care Ontario, 2015.

**Table 1** Red meat consumption in grams per day and the proportion of the population in each of ten consumption categories by age/sex group.

| Meat Consumption Category (grams) | 35 – 44       |   | 45 – 54       |   | 55 – 64       |   | ≥ 65          |   |
|-----------------------------------|---------------|---|---------------|---|---------------|---|---------------|---|
|                                   | Grams per day | % | Grams per day | % | Grams per day | % | Grams per day | % |
|                                   |               |   |               |   |               |   |               |   |

| per day)                  |        |              |        |       |        |       |        |       |  |
|---------------------------|--------|--------------|--------|-------|--------|-------|--------|-------|--|
|                           |        | <b>MEN</b>   |        |       |        |       |        |       |  |
| 1: < 14.5                 | 8.52   | 2.66         | 8.67   | 3.77  | 9.13   | 4.67  | 8.98   | 5.89  |  |
| 2: 14.5 – 21.4            | 18.27  | 4.00         | 18.09  | 4.36  | 17.97  | 6.31  | 17.94  | 9.11  |  |
| 3: 21.5 – 27.9            | 25.06  | 4.92         | 24.58  | 5.52  | 24.80  | 7.53  | 24.92  | 11.58 |  |
| 4: 28.0 – 34.2            | 31.04  | 6.56         | 31.10  | 6.90  | 31.09  | 7.25  | 31.38  | 7.61  |  |
| 5: 34.3 – 41.3            | 37.53  | 7.48         | 37.65  | 7.86  | 37.58  | 8.94  | 38.05  | 9.97  |  |
| 6: 41.4 – 49.2            | 45.54  | 8.40         | 45.60  | 9.43  | 45.00  | 10.20 | 45.51  | 9.75  |  |
| 7: 49.3 – 59.2            | 54.26  | 11.31        | 54.17  | 11.07 | 54.16  | 10.82 | 53.59  | 9.65  |  |
| 8: 59.3 – 73.3            | 65.57  | 14.14        | 65.98  | 13.21 | 65.88  | 12.16 | 65.95  | 13.72 |  |
| 9: 73.4 – 100.3           | 85.31  | 16.77        | 85.73  | 16.28 | 85.92  | 15.14 | 86.82  | 10.93 |  |
| 10: ≥ 100.4               | 154.29 | 23.74        | 154.03 | 21.60 | 144.21 | 16.98 | 149.84 | 11.79 |  |
| <b>Mean grams per day</b> | 77.22  |              | 73.81  |       | 65.00  |       | 57.04  |       |  |
|                           |        | <b>WOMEN</b> |        |       |        |       |        |       |  |
| 1: < 14.5                 | 9.28   | 10.22        | 8.95   | 13.57 | 9.31   | 14.86 | 9.07   | 19.20 |  |
| 2: 14.5 – 21.4            | 18.05  | 11.48        | 18.07  | 12.17 | 17.92  | 15.03 | 18.02  | 15.79 |  |
| 3: 21.5 – 27.9            | 24.86  | 12.01        | 24.71  | 12.22 | 24.66  | 12.34 | 24.87  | 14.67 |  |
| 4: 28.0 – 34.2            | 30.97  | 11.40        | 30.98  | 11.27 | 30.85  | 11.10 | 30.98  | 11.50 |  |
| 5: 34.3 – 41.3            | 37.54  | 12.33        | 37.59  | 11.49 | 37.72  | 10.76 | 37.44  | 10.19 |  |
| 6: 41.4 – 49.2            | 45.07  | 10.46        | 45.22  | 10.28 | 45.28  | 10.71 | 44.69  | 8.70  |  |
| 7: 49.3 – 59.2            | 54.21  | 10.66        | 53.81  | 9.77  | 53.69  | 8.24  | 53.87  | 8.02  |  |
| 8: 59.3 – 73.3            | 65.65  | 9.11         | 65.58  | 7.97  | 65.82  | 7.83  | 65.72  | 5.66  |  |
| 9: 73.4 – 100.3           | 84.45  | 7.80         | 84.19  | 7.03  | 85.00  | 5.87  | 84.47  | 4.10  |  |
| 10: ≥ 100.4               | 131.99 | 4.53         | 132.78 | 4.22  | 134.37 | 3.27  | 129.22 | 2.18  |  |
| <b>Mean grams per day</b> | 43.20  |              | 40.90  |       | 38.41  |       | 33.81  |       |  |

**Table 2** Processed meat consumption in grams per day and the proportion of the population (%) and corresponding 95% confidence intervals in each of ten consumption categories by age/sex group, Alberta.

| Meat Consumption Category (grams per day) | 35 – 44       |                  | 45 – 54       |                  | 55 – 64       |                  | ≥ 65          |                  |
|-------------------------------------------|---------------|------------------|---------------|------------------|---------------|------------------|---------------|------------------|
|                                           | Grams per day | % (95% CI)       | Grams per day | % (95% CI)       | Grams per day | % (95% CI)       | Grams per day | % (95% CI)       |
| <b>MEN</b>                                |               |                  |               |                  |               |                  |               |                  |
| 1: < 1.7                                  | 0.88          | 2.7 (2.1,3.3)    | 0.92          | 3.9 (3.2,4.5)    | 0.93          | 5.4 (4.5,6.3)    | 0.97          | 6.3 (4.8,7.9)    |
| 2: 1.7 – 3.1                              | 2.40          | 2.7 (2.1,3.2)    | 2.45          | 3.0 (2.5,3.6)    | 2.45          | 5.5 (4.6,6.4)    | 2.45          | 6.3 (4.8,7.9)    |
| 3: 3.1 – 4.5                              | 3.67          | 4.7 (3.9,5.4)    | 3.72          | 5.7 (5.0,6.5)    | 3.71          | 8.5 (7.4,9.6)    | 3.66          | 8.0 (6.3,9.8)    |
| 4: 4.5 – 6.2                              | 5.25          | 6.1 (5.2,7.0)    | 5.24          | 7.6 (6.7,8.5)    | 5.23          | 9.5 (8.4,10.7)   | 5.24          | 9.7 (7.8,11.5)   |
| 5: 6.2 – 8.2                              | 7.23          | 9.3 (8.2,10.3)   | 7.17          | 9.7 (8.8,10.7)   | 7.25          | 10.4 (9.2,11.6)  | 7.21          | 12.2 (10.1,14.3) |
| 6: 8.2 – 11.0                             | 9.59          | 9.7 (8.7,10.8)   | 9.53          | 8.8 (7.8,9.7)    | 9.55          | 10.0 (8.8,11.1)  | 9.61          | 10.6 (8.6,12.6)  |
| 7: 11.1 – 15.0                            | 12.90         | 12.0 (10.8,13.2) | 12.79         | 11.9 (10.8,12.9) | 12.76         | 11.5 (10.3,12.8) | 12.95         | 13.0 (10.8,15.1) |
| 8: 15.0 – 21.5                            | 17.96         | 13.9 (12.7,15.2) | 18.11         | 14.4 (13.3,15.6) | 18.11         | 12.2 (11.0,13.5) | 18.23         | 11.5 (9.4,13.5)  |
| 9: 21.5 – 32.6                            | 26.51         | 16.8 (15.4,18.1) | 26.83         | 14.6 (13.4,15.8) | 26.41         | 13.0 (11.7,14.3) | 26.81         | 11.2 (9.2,13.3)  |
| 10: ≥ 32.6                                | 56.94         | 22.1 (20.6,23.6) | 56.57         | 20.4 (19.0,21.7) | 54.45         | 13.9 (12.5,15.2) | 50.70         | 11.2 (9.1,13.2)  |
| <b>Mean grams per day</b>                 | 7.19          |                  | 6.92          |                  | 6.27          |                  | 6.02          |                  |
| <b>WOMEN</b>                              |               |                  |               |                  |               |                  |               |                  |
| 1: < 1.7                                  | 0.97          | 9.7 (8.8,10.5)   | 0.99          | 13.7 (12.8,14.5) | 1.02          | 16.8 (15.7,18.0) | 0.96          | 20.0 (18.1,22.0) |
| 2: 1.7 – 3.1                              | 2.43          | 8.3 (7.5,9.0)    | 2.41          | 10.9 (10.1,11.7) | 2.38          | 13.2 (12.1,14.2) | 2.37          | 14.7 (12.9,16.4) |
| 3: 3.1 – 4.5                              | 3.68          | 10.4 (9.5,11.2)  | 3.65          | 12.7 (11.8,13.5) | 3.66          | 13.6 (12.6,14.6) | 3.68          | 13.6 (11.9,15.3) |
| 4: 4.5 – 6.2                              | 5.24          | 11.1 (10.2,11.9) | 5.21          | 12.6 (11.7,13.4) | 5.25          | 12.2 (11.2,13.2) | 5.17          | 11.9 (10.3,13.4) |
| 5: 6.2 – 8.2                              | 8             | 12.6 (11.7,13.5) | 7.16          | 11.9 (11.1,12.8) | 7.23          | 11.7 (10.7,12.7) | 7.17          | 9.1 (7.7,10.5)   |
| 6: 8.2 – 11.0                             | 9.57          | 10.8 (10.0,11.7) | 9.50          | 9.2 (8.4,9.9)    | 9.56          | 8.1 (7.3,8.9)    | 9.60          | 7.6 (6.3,8.9)    |
| 7: 11.1 – 15.0                            | 12.69         | 10.9 (10.0,11.7) | 12.83         | 9.3 (8.5,10.0)   | 12.80         | 7.7 (6.9,8.6)    | 12.89         | 6.0 (4.9,7.2)    |
| 8: 15.0 – 21.5                            | 17.85         | 10.9 (10.0,11.7) | 17.93         | 8.0 (7.3,8.7)    | 17.90         | 6.7 (5.9,7.4)    | 17.63         | 6.7 (5.5,7.9)    |
| 9: 21.5 – 32.6                            | 24.94         | 9.2 (8.4,10.1)   | 26.30         | 7.5 (6.8,8.2)    | 26.11         | 5.4 (4.7,6.1)    | 26.09         | 6.1 (4.9,7.3)    |
| 10: ≥ 32.6                                | 49.80         | 6.2 (5.5,6.9)    | 47.89         | 4.3 (3.8,4.8)    | 46.11         | 4.5 (3.9,5.2)    | 47.36         | 4.2 (3.2,5.2)    |
| <b>Mean grams per day</b>                 | 5.38          |                  | 4.78          |                  | 4.42          |                  | 4.22          |                  |

1  
2  
3  
4  
5  
6  
7  
8  
9  
10  
11  
12  
13  
14  
15  
16  
17  
18  
19  
20  
21  
22  
23  
24  
25  
26  
27  
28  
29  
30  
31  
32  
33  
34  
35  
36  
37  
38  
39  
40  
41  
42  
43  
44  
45  
46  
47  
48  
49

**Table 3** Estimated Risks with Consumption of Red and Processed Meat and Latency Periods for PAR Calculations

| Cancer Site           | Gender | RR Estimate | Units     | Risk per gram per day | Source     | Latency Period |
|-----------------------|--------|-------------|-----------|-----------------------|------------|----------------|
| <i>Red Meat</i>       |        |             |           |                       |            |                |
| Colorectal            | All    | 1.17        | 100 g/day | 0.0016                | WCRF, 2011 | 8 years        |
| Colorectal            | Men    | 1.28        | 100 g/day | 0.0025                | WCRF, 2011 | 8 years        |
| Colorectal            | Women  | 1.05        | 100 g/day | 0.00049               | WCRF, 2011 | 8 years        |
| Colon                 | All    | 1.12        | 100 g/day | 0.0011                | WCRF, 2011 | 8 years        |
| Colon                 | Men    | 1.00        | 100 g/day | 0                     | WCRF, 2011 | 8 years        |
| Colon                 | Women  | 1.06        | 100 g/day | 0.00058               | WCRF, 2011 | 8 years        |
| Rectum                | All    | 1.18        | 100 g/day | 0.0017                | WCRF, 2011 | 8 years        |
| <i>Processed Meat</i> |        |             |           |                       |            |                |
| Colorectal            | All    | 1.18        | 50 g/day  | 0.0033                | WCRF, 2011 | 8 years        |
| Colorectal            | Men    | 1.11        | 50 g/day  | 0.0021                | WCRF, 2011 | 8 years        |
| Colorectal            | Women  | 1.09        | 50 g/day  | 0.0017                | WCRF, 2011 | 8 years        |
| Colon                 | All    | 1.24        | 50 g/day  | 0.0043                | WCRF, 2011 | 8 years        |
| Colon                 | Men    | 1.38        | 50 g/day  | 0.0064                | WCRF, 2011 | 8 years        |
| Colon                 | Women  | 1.64        | 50 g/day  | 0.0099                | WCRF, 2011 | 8 years        |
| Rectum                | All    | 1.12        | 50 g/day  | 0.0023                | WCRF, 2011 | 8 years        |

**Table 4** Cancer cases and proportions attributable to red meat intake in Alberta in 2012

| Age at Exposure (years)  | Age at Outcome (years) | Colorectal           |                             |                  | Colon                |                             |                  | Rectum               |                             |                  |
|--------------------------|------------------------|----------------------|-----------------------------|------------------|----------------------|-----------------------------|------------------|----------------------|-----------------------------|------------------|
|                          |                        | Total Observed Cases | PAR % (95% CI) <sup>a</sup> | EAC <sup>b</sup> | Total Observed Cases | PAR % (95% CI) <sup>a</sup> | EAC <sup>b</sup> | Total Observed Cases | PAR % (95% CI) <sup>a</sup> | EAC <sup>b</sup> |
| <b>Men</b>               |                        |                      |                             |                  |                      |                             |                  |                      |                             |                  |
| 35 - 44                  | 43 - 52                | 96                   | 17.9 (0-67.3)               | 17               | 38                   | 8.5 (0-18.5)                | 3                | 58                   | 12.3 (0-24.7)               | 7                |
| 45 - 54                  | 53 - 62                | 280                  | 17.2 (0-65.6)               | 48               | 139                  | 8.2 (0-17.8)                | 11               | 141                  | 11.8 (0-23.7)               | 17               |
| 55 - 64                  | 63 - 72                | 320                  | 15.3 (0-60.4)               | 49               | 177                  | 7.2 (0-15.8)                | 13               | 143                  | 10.4 (0-21.1)               | 15               |
| ≥ 65                     | ≥ 73                   | 383                  | 13.6 (0-56.1)               | 52               | 260                  | 6.4 (0-14.1)                | 17               | 123                  | 9.2 (0-19.2)                | 11               |
| Total                    | Total                  | 1079                 |                             | 166              | 614                  |                             | 44               | 465                  |                             | 50               |
| <b>Women</b>             |                        |                      |                             |                  |                      |                             |                  |                      |                             |                  |
| 35 - 44                  | 43 - 52                | 81                   | 2.1 (0-14.4)                | 2                | 42                   | 4.8 (0-10.7)                | 2                | 39                   | 7 (0-14.5)                  | 3                |
| 45 - 54                  | 53 - 62                | 181                  | 2.0 (0-13.4)                | 4                | 105                  | 4.6 (0-10.2)                | 5                | 76                   | 6.6 (0-13.9)                | 5                |
| 55 - 64                  | 63 - 72                | 202                  | 1.9 (0-13.0)                | 4                | 125                  | 4.3 (0-9.5)                 | 5                | 77                   | 6.3 (0-13.0)                | 5                |
| ≥ 65                     | ≥ 73                   | 356                  | 1.6 (0-11.5)                | 6                | 265                  | 3.8 (0-8.4)                 | 10               | 91                   | 5.5 (0-11.5)                | 5                |
| Total                    | Total                  | 820                  |                             | 15               | 537                  |                             | 22               | 283                  |                             | 18               |
| <b>Total<sup>c</sup></b> |                        |                      |                             |                  |                      |                             |                  |                      |                             |                  |
| 35 - 44                  | 43 - 52                | 177                  | 10.7                        | 19               | 80                   | 6.6                         | 5                | 97                   | 10.2                        | 10               |
| 45 - 54                  | 53 - 62                | 461                  | 11.2                        | 52               | 244                  | 6.6                         | 16               | 217                  | 10                          | 22               |
| 55 - 64                  | 63 - 72                | 522                  | 10.1                        | 53               | 302                  | 6                           | 18               | 220                  | 9                           | 20               |
| ≥ 65                     | ≥ 73                   | 739                  | 7.8                         | 58               | 525                  | 5.1                         | 27               | 214                  | 7.6                         | 16               |
| Total                    | Total                  | 1899                 |                             | 181              | 1151                 |                             | 66               | 748                  |                             | 68               |

a. PAR, population attributable risk

b. EAC, excess attributable cases. Numbers rounded to nearest case.

c. Values for 'Total' (Men and Women combined) may not match individual totals for Men and Women.

1  
2  
3  
4  
5  
6  
7  
8  
9  
10  
11  
12  
13  
14  
15  
16  
17  
18  
19  
20  
21  
22  
23  
24  
25  
26  
27  
28  
29  
30  
31  
32  
33  
34  
35  
36  
37  
38  
39  
40  
41  
42  
43  
44  
45  
46  
47  
48  
49

**Table 5** Cancer cases and proportions attributable to processed meat intake in Alberta in 2012

| Age at Exposure (years) | Age at Outcome (years) | Colorectal           |                             |                  | Colon                |                             |                  | Rectum               |                             |                  |
|-------------------------|------------------------|----------------------|-----------------------------|------------------|----------------------|-----------------------------|------------------|----------------------|-----------------------------|------------------|
|                         |                        | Total Observed Cases | PAR % (95% CI) <sup>a</sup> | EAC <sup>b</sup> | Total Observed Cases | PAR % (95% CI) <sup>a</sup> | EAC <sup>b</sup> | Total Observed Cases | PAR % (95% CI) <sup>a</sup> | EAC <sup>b</sup> |
| <b>Men</b>              |                        |                      |                             |                  |                      |                             |                  |                      |                             |                  |
| 35 - 44                 | 43 - 52                | 96                   | 4.8 (0-16.0)                | 5                | 38                   | 9.9 (5.7-13.9)              | 4                | 58                   | 5.2 (0-11.2)                | 3                |
| 45 - 54                 | 53 - 62                | 280                  | 4.5 (0-15.5)                | 13               | 139                  | 9.3 (5.3-13.3)              | 13               | 141                  | 4.9 (0-10.5)                | 7                |
| 55 - 64                 | 63 - 72                | 320                  | 3.6 (0-12.7)                | 12               | 177                  | 7.5 (4.2-10.7)              | 13               | 143                  | 3.9 (0-8.4)                 | 6                |
| ≥ 65                    | ≥ 73                   | 383                  | 3.2 (0-11.0)                | 12               | 260                  | 6.6 (3.8-9.5)               | 17               | 123                  | 3.5 (0-7.4)                 | 4                |
| Total                   | Total                  | 1079                 |                             | 41               | 614                  |                             | 47               | 465                  |                             | 20               |
| <b>Women</b>            |                        |                      |                             |                  |                      |                             |                  |                      |                             |                  |
| 35 - 44                 | 43 - 52                | 81                   | 2.1 (0-6.9)                 | 2                | 42                   | 5.1 (2.8-7.4)               | 2                | 39                   | 2.7 (0-5.7)                 | 1                |
| 45 - 54                 | 53 - 62                | 181                  | 1.7 (0-5.9)                 | 3                | 105                  | 4.3 (2.4-6.1)               | 4                | 76                   | 2.2 (0-4.9)                 | 2                |
| 55 - 64                 | 63 - 72                | 202                  | 1.5 (0-5.2)                 | 3                | 125                  | 3.9 (2.2-5.6)               | 5                | 77                   | 2.0 (0-4.4)                 | 2                |
| ≥ 65                    | ≥ 73                   | 356                  | 1.5 (0-5.1)                 | 5                | 265                  | 3.7 (2.1-5.4)               | 10               | 91                   | 2.0 (0-4.2)                 | 2                |
| Total                   | Total                  | 820                  |                             | 13               | 537                  |                             | 21               | 283                  |                             | 6                |
| <b>Total</b>            |                        |                      |                             |                  |                      |                             |                  |                      |                             |                  |
| 35 - 44                 | 43 - 52                | 177                  | 3.6                         | 6                | 80                   | 7.4                         | 6                | 97                   | 4.2                         | 4                |
| 45 - 54                 | 53 - 62                | 461                  | 3.4                         | 16               | 244                  | 7.1                         | 17               | 217                  | 4                           | 9                |
| 55 - 64                 | 63 - 72                | 522                  | 2.8                         | 15               | 302                  | 6                           | 18               | 220                  | 3.3                         | 7                |
| ≥ 65                    | ≥ 73                   | 739                  | 2.4                         | 18               | 525                  | 5.1                         | 27               | 214                  | 2.8                         | 6                |
| Total                   | Total                  | 1899                 |                             | 54               | 1151                 |                             | 68               | 748                  |                             | 26               |

a. PAR, population attributable risk  
 b. EAC, excess attributable cases. Numbers rounded to nearest case.  
 c. Values for 'Total' (Men and Women combined) may not match individual totals for Men and Women.



**Table 6** Summary of cases and proportions of cancer in Alberta adults in 2012 attributable to red and processed meat intake<sup>a</sup>

| Cancer Site <sup>b</sup>                  | Total                       |                                        |                             | Men                         |                                        |                             | Women                       |                                        |                             |
|-------------------------------------------|-----------------------------|----------------------------------------|-----------------------------|-----------------------------|----------------------------------------|-----------------------------|-----------------------------|----------------------------------------|-----------------------------|
|                                           | Observed Cases <sup>c</sup> | Excess Attributable Cases <sup>d</sup> | % Attributable <sup>e</sup> | Observed Cases <sup>c</sup> | Excess Attributable Cases <sup>d</sup> | % Attributable <sup>e</sup> | Observed Cases <sup>c</sup> | Excess Attributable Cases <sup>d</sup> | % Attributable <sup>e</sup> |
| <b>Red Meat</b>                           |                             |                                        |                             |                             |                                        |                             |                             |                                        |                             |
| Colorectum                                | 1899                        | 181                                    | 9.5                         | 1079                        | 166                                    | 15.4                        | 820                         | 15                                     | 1.8                         |
| Colon                                     | 1151                        | 66                                     | 5.7                         | 614                         | 44                                     | 7.1                         | 537                         | 22                                     | 4.1                         |
| Rectum                                    | 748                         | 68                                     | 9                           | 465                         | 50                                     | 10.7                        | 283                         | 18                                     | 6.2                         |
| <b>All Associated Cancers<sup>f</sup></b> | 1899                        | 181                                    | 9.5                         | 614                         | 166                                    | 15.4                        | 537                         | 15                                     | 1.8                         |
| <b>All Cancers<sup>g</sup></b>            | 15836                       | 181                                    | 1.1                         | 8155                        | 166                                    | 2.0                         | 7681                        | 15                                     | 0.2                         |
| <b>Processed Meat</b>                     |                             |                                        |                             |                             |                                        |                             |                             |                                        |                             |
| Colorectum                                | 1899                        | 54                                     | 2.9                         | 1079                        | 41                                     | 3.8                         | 820                         | 13                                     | 1.6                         |
| Colon                                     | 1151                        | 68                                     | 5.9                         | 614                         | 47                                     | 7.6                         | 537                         | 21                                     | 4.0                         |
| Rectum                                    | 748                         | 26                                     | 3.5                         | 465                         | 20                                     | 4.3                         | 283                         | 6                                      | 2.2                         |
| <b>All Associated Cancers<sup>f</sup></b> | 1899                        | 54                                     | 2.9                         | 1079                        | 41                                     | 3.8                         | 537                         | 13                                     | 1.6                         |
| <b>All Cancers<sup>g</sup></b>            | 15836                       | 54                                     | 0.3                         | 8155                        | 41                                     | 0.5                         | 7681                        | 13                                     | 0.2                         |

a. Red and processed meat consumption data for Alberta from Alberta's Tomorrow Project cohort. In this cohort diet history questionnaire estimated the number of ounces of each of red (beef, pork, lamb, veal, venison, liver etc.) and processed (cold cuts, sausage, ham, hot dogs) meat consumed each day

b. Cancer incidence data obtained from the Alberta Cancer Registry. Data from 2012 was used for observed cancer cases for all cancer sites.

c. Number of observed cancer cases in Alberta in 2012 at individual cancer sites.

d. Number of cancer cases at individual cancer sites that can be attributed to red and processed meat consumption.

e. Proportion of cancers at individual cancer sites attributable to red and processed meat consumption. Calculated as excess attributable cases/observed cases.

f. Represents all cancers with a known association with red and processed meat consumption as listed in table. In this cases these values represent colorectal cancer, as colon and rectal cancers are subsets of this type.

g. Represents all incident cancers in Alberta in 2012 in all age groups.

1  
2  
3  
4  
5  
6  
7  
8  
9  
10  
11  
12  
13  
14  
15  
16  
17  
18  
19  
20  
21  
22  
23  
24  
25  
26  
27  
28  
29  
30  
31  
32  
33  
34  
35  
36  
37  
38  
39  
40  
41  
42  
43  
44  
45  
46  
47  
48  
49  
50  
51  
52  
53  
54  
55  
56  
57  
58  
59  
60

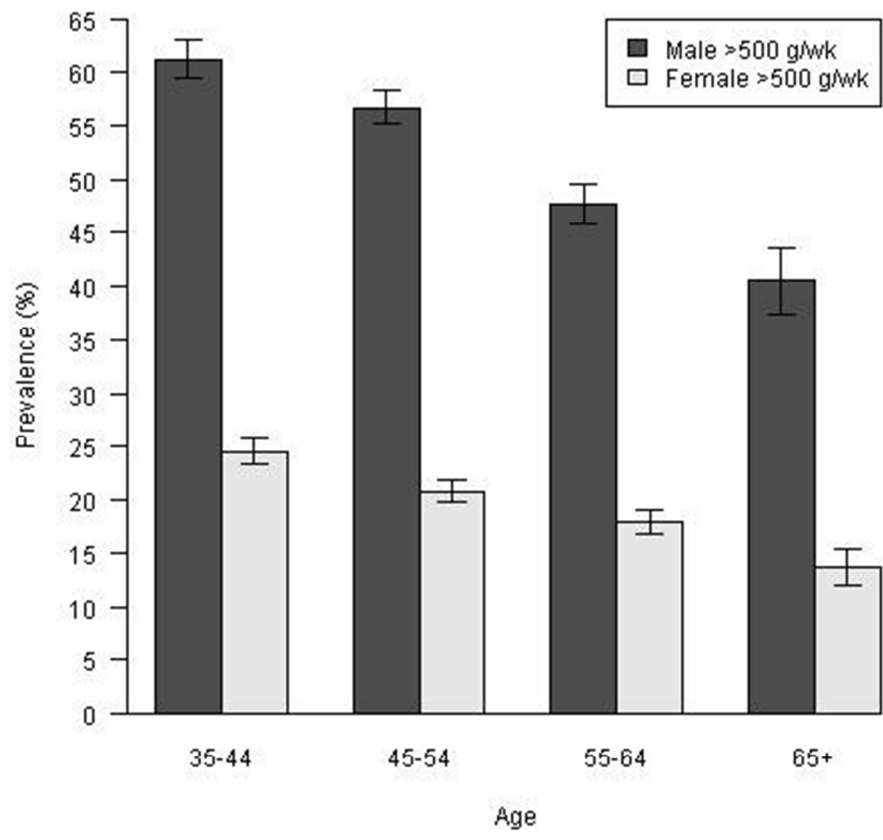

**Figure 1** Proportion of men and women in Alberta’s Tomorrow Project cohort consuming >500. g/week of red and processed meat by age group

1  
2  
3 **A Methodologic Framework to Evaluate the Number of Cancers Attributable to Lifestyle and**  
4 **Environment in Alberta, Canada**  
5  
6

7 Anne Grundy PhD<sup>1</sup>, Christine M. Friedenreich PhD<sup>1,2,3</sup>, Abbey E. Poirier MSc<sup>1</sup>, Farah Khandwala MSc<sup>1</sup>,  
8 Darren R. Brenner PhD<sup>1,2,3\*</sup>  
9

- 10  
11
- 12 1. Department of Cancer Epidemiology and Prevention Research, Alberta Health Services-  
13 CancerControl Alberta, Calgary, Alberta, Canada
  - 14 2. Department of Oncology, Cumming School of Medicine, University of Calgary, Calgary, Alberta,  
15 Canada
  - 16 3. Department of Community Health Sciences, Cumming School of Medicine, University of  
17 Calgary, Calgary, Alberta, Canada
  - 18 4. Alberta Cancer Prevention Legacy Fund, Division of Population, Public and Aboriginal Health,  
19 Alberta Health Services, Calgary, Alberta, Canada  
20

21  
22  
23 \*Corresponding Author:

24 Darren R. Brenner

25 [Darren.Brenner@albertahealthservices.ca](mailto:Darren.Brenner@albertahealthservices.ca)

26 Department of Cancer Epidemiology and Prevention Research

27 CancerControl Alberta, Alberta Health Services

28 Holy Cross Centre – Room 513C

29 Box ACB, 2210 – 2<sup>nd</sup> St. SW.

30 Calgary, AB.

31 T2S 3C3  
32  
33  
34  
35

36 **Abstract Word Count:** 227

37 **Manuscript Word Count:** 3,001

38 **Running Title:** Methods for Estimating Cancer Incidence Attributable to Lifestyle and Environment in  
39 Alberta

40 **Keywords:** population attributable risk; cancer; lifestyle; environment; Alberta; methods  
41  
42  
43  
44  
45  
46  
47  
48  
49  
50  
51  
52  
53  
54  
55  
56  
57  
58  
59  
60

**ABSTRACT**

**Background:** Previous research to estimate population attributable risks for cancer in Alberta has been limited. Attributable burden estimates are important for planning and implementing population-based cancer prevention strategies. This manuscript describes a methodologic framework to estimate the number of incident cancers attributable to modifiable lifestyle and environmental risk factors in Alberta, Canada.

**Methods:** Population attributable risks for cancer were estimated for exposures to 24 established cancer risk factors. These included: tobacco consumption and environmental tobacco exposure, environmental factors, infectious agents, hormone therapies, dietary intake, obesity and physical inactivity. Risk estimates, to quantify the association between individual exposures and cancer sites, as well as prevalence estimates for individual exposures in Alberta were used to estimate the proportion of cancer in Alberta that could be attributed to each exposure. These estimations were conducted in the context of a theoretical minimum risk principle, where exposures corresponding to the lowest levels of population risk were used as the comparisons for alternate exposure levels.

**Interpretation:** Herein we outline the main methodological principles for the protocol used in evaluating population attributable risks for modifiable lifestyle and environmental risk factors for cancer in Alberta. The findings from this work will be disseminated to the scientific community through publications in peer-reviewed journals and conference presentations, as well as to the general public and public health professionals in collaboration with the Alberta Cancer Prevention Legacy Fund.

## BACKGROUND

Population attributable risks provide an estimate of the proportion of a given disease that can be attributed to exposure to an individual risk factor.[1] These estimates inform public health planning and disease prevention programs by identifying exposures that have the greatest impact on disease incidence.

To date, limited research effort has focused on estimating these population attributable risks for modifiable risk factors and cancer in Canada and more specifically in Alberta. A 2009 analysis of the economic burden of occupational cancers in Alberta [2] did not include any population-based estimates of attributable fractions of cancer for non-occupational exposures. Additionally, while there have been a number of efforts in recent years to address the population attributable risks of individual risk factors for either Canada or other provinces individually [3-9], no systematic estimations of attributable cancer incidence across the spectrum of modifiable lifestyle and environmental risk factors have been completed in Canada. Since information concerning the fraction of cancer attributable to individual risk factors is essential for both resource allocation and implementation of population-based cancer prevention strategies, additional research that identifies priorities for modifiable cancer risk factors in Alberta is needed. To address this need, we conducted a systematic estimation of the burden of cancer attributable to all accepted modifiable risk factors in Alberta. In this paper we describe the methodologic framework that was used to identify relevant exposure-cancer associations and systematically estimate the proportion of incident cancer cases attributable to previous exposure to modifiable risk factors among Albertans. As the first in a series of manuscripts that will be presented concerning population attributable cancer risks in Alberta, this paper provides an overview of the general methodologic principles used for all exposures. Exposure-specific manuscripts will provide greater details related to exposure-specific methods.

## METHODS

Modifiable lifestyle and environmental risk factors for cancer were selected for inclusion in this project on the basis of a literature search of three main sources: 1) the International Agency for Research on Cancer Monograph Series; 2) the World Cancer Research Fund Report [10]; and 3) recent meta-analyses, large prospective cohort studies and/or the current epidemiologic literature. Selected exposures can be classified in the categories of: tobacco consumption and exposure, environmental factors (air, water and soil contaminants and components), infectious agents, hormone therapies, dietary intake characteristics and energy imbalance. The full list of exposures and cancer sites of interest for this project is shown in Table 2. A secondary consideration in the selection of exposures was the expected range of population prevalence of the individual exposures, since those with very low prevalence are not of high value in population-based preventive efforts assuming moderate risk associations.

### Data Sources

Three main types of data are required for the estimation of population attributable risks. These are: 1) the magnitude of the risk association between individual exposures and cancer sites; 2) estimates of the population prevalence of individual exposures; and 3) current age and sex specific cancer incidence data for the associated cancer sites. These data were obtained and used in the analyses for each exposure/cancer site pair of interest.

#### *Risk Estimate Data*

As the objective of this work was to produce population attributable cancer risk estimates representative of the general Alberta population, risk estimates applicable to this population were sought from several sources of epidemiologic data. A review of reports from International Collaborative Groups/Panels (e.g. International Agency for Research on Cancer, World Cancer Research Fund), along with a review of the current published peer-reviewed literature in PubMed, was conducted to extract estimates of risk for each exposure and cancer site of interest for this project. Following this review, estimates of relative risk (RR), hazard ratio (HR), odds ratio (OR) or incidence rate ratio (IRR) were

1  
2  
3 selected according to the hierarchy shown in Figure 1. This strategy assumed that the individual risk  
4 estimates reflect biological phenomena, such that results from populations outside Alberta or Canada are  
5 applicable to the Alberta population. For individual exposures, risk estimates corresponding to the highest  
6 available rank on the hierarchy were used in exposure-specific analyses. For example, if risk estimates  
7 were available from both international collaborative panels and recent meta-analyses, the estimate from  
8 an international collaborative panel was used since it corresponded to a higher rank on the hierarchy  
9 presented in Figure 1. This process produced a single risk estimate for each exposure/cancer site pair,  
10 stratified by gender where appropriate, that was used in the estimation of population attributable risks.  
11  
12  
13  
14  
15  
16  
17  
18  
19

### 20 *Exposure Prevalence Data*

21  
22 Prevalence data for the exposures of interest were collected at the provincial level. Prevalence  
23 data were obtained from a search of: 1) results from Statistics Canada surveys; 2) publically available  
24 government databases; 3) published peer-reviewed literature; and 4) consultation with relevant experts.  
25  
26  
27  
28  
29 Data sources for estimation of exposure prevalence were selected according to the hierarchy shown in  
30 Figure 2, where data from the highest ranking available source from the hierarchy were used. Where  
31 available, exposure prevalence data were age and sex-specific measures of exposure prevalence were  
32 obtained.  
33  
34  
35  
36  
37

38 For all potential sources of exposure prevalence data, several characteristics of available data  
39 sources were considered. First, a theoretical minimum risk principle was used to characterize relevant  
40 measures of exposure.[11] This principle refers to the concept that for meaningful population attributable  
41 risk estimates, alternative population levels of exposure or exposure distributions must be compared.  
42  
43  
44  
45  
46 Under the theoretical minimum risk model, the exposure distribution that corresponds to the lowest level  
47 of population risk is used as the comparison.[11] To apply this concept to our analysis, for risk factors  
48 where complete lack of exposure is possible, those with any exposure to the risk factor were considered  
49 exposed and the prevalence of all potential levels of exposure (if more than one level is appropriate) was  
50 obtained for use in population attributable risk calculations. For example, with active tobacco exposure,  
51 both current and former smokers were considered to have some level of exposure, with never smokers  
52  
53  
54  
55  
56  
57  
58  
59  
60

1  
2  
3 used as a comparison (i.e. minimum risk) group. For risk factors where all individuals have some level of  
4 exposure such that zero is not a relevant value (e.g. body mass index), the level of exposure associated  
5 with the lowest degree of cancer risk was used as the “unexposed” group and the prevalence of higher  
6 levels of exposure (ex. overweight and obese for body mass index) was used in population attributable  
7 risk calculations.  
8  
9

10  
11  
12  
13  
14 Since the effect of exposure on cancer risk is assumed to be the product of a previous exposure,  
15 we identified a biologically meaningful latency period for all exposures from the literature. To quantify  
16 this latency period, we distinguish between the theoretical latency period (the time between initiation of  
17 exposure and cancer diagnosis) and the measured latency period (the time between exposure  
18 measurement and cancer diagnosis), as shown in Figure 3. For these analyses and the selection of  
19 appropriate exposure prevalence data, we attempted to quantify the measured latency period and  
20 subsequently refer to this simply as the “latency period” for simplicity. To quantify the measured latency  
21 period we used the average time between exposure measurement and cancer diagnosis obtained from  
22 high-quality cohort studies. The quality of cohort studies was evaluated based on the size of the cohort,  
23 methods of exposure assessment and follow-up time, where large cohorts with detailed exposure and  
24 longer follow-up were considered to be of highest quality. This information concerning the latency period  
25 was then compared with the time period for which high-quality exposure prevalence data were available.  
26 Where possible, prevalence estimates corresponding to the midpoint of the range of potential latency  
27 periods identified from cohort studies were selected for analysis. For example, if cohort studies identified  
28 potential latency periods as between nine and 13 years, exposure prevalence data incorporating an 11 year  
29 latency period were selected for analysis if available. When high-quality exposure prevalence data within  
30 the range of latency periods for a given exposure could not be identified, the closest available estimates  
31 were used.  
32  
33  
34  
35  
36  
37  
38  
39  
40  
41  
42  
43  
44  
45  
46  
47  
48  
49  
50  
51  
52

53 The availability of exposure data in units or measures reflective of the selected risk estimates  
54 were also evaluated such that, where possible, an exposure data source with similar units to the selected  
55 risk estimate was identified. In instances where a less representative exposure data source was utilized  
56  
57  
58  
59  
60



(e.g. cohort instead of survey data), sensitivity analyses were performed where possible to characterize the potential impact of this choice on estimates of population attributable risk.

#### *Cancer Incidence Data*

Data on current cancer incidence levels in Alberta were needed to quantify the number of current incident cancer cases that could be attributed to individual exposures. Data on cancer incidence in 2012 (the most recent year for which complete data were available) were obtained from the Alberta Cancer Registry. Cases were classified using the International Classification of Diseases for Oncology, Third Edition (ICD-O-3) and the International Agency for Research on Cancer rules for determining multiple primary sites. The complete list of cancer sites and ICD-O-3 codes used for this request are found in Supplementary Table 1.

#### **Analytic Methods**

The formula of Levin [12], shown in Equation 1, was used as the basis to estimate most population attributable risk values. This method uses information on the prevalence of a given exposure in the Alberta population in combination with a relative risk measure to estimate population attributable risk.

$$\text{Equation 1: } PAR = \frac{Pe (RR - 1)}{1 + [Pe (RR - 1)]}$$

*PAR* = Population attributable risk

*Pe* = Prevalence of exposure

*RR* = Relative Risk

For risk factors with multiple levels of exposure (i.e.. low, medium, high) a variant of this formula, similar to that used by Parkin [13] was used (Equation 2). In this formula, estimates of prevalence in each exposure category ( $P_{ex}$ ) and excess relative risk (ERR), where  $ERR=RR-1$ , are substituted into the Levin formula.

$$\text{Equation 2: } PAR = \frac{(p_{e1} \times ERR_1) + (P_{e2} \times ERR_2) + \dots + (P_{ex} \times ERR_x)}{1 + ((p_{e1} \times ERR_1) + (P_{e2} \times ERR_2) + \dots + (P_{ex} \times ERR_x))}$$

Equation 1 was used to estimate population attributable risk for exposure to UV; disinfection by-products; oral contraceptives and hormone replacement therapy. The variant approach from Equation 2 was used for tobacco (both active and passive); intake of fruits/vegetables, red/processed meat, alcohol and fibre; overweight/obesity; and physical inactivity.

Population attributable risks associated with infectious disease exposures were evaluated using one of two formulae, similar to the methods of de Martel *et. al.*[14] Population attributable risk is estimated retrospectively in Equation 3, using the prevalence of exposure among cases as a substitute for prevalence of exposure in the population.[15]

$$\text{Equation 3: } PAR = p_c \frac{(RR - 1)}{RR}$$

$p_c$  = prevalence of exposure among cases

Equation 3 was used for *Helicobacter Pylori*, Epstein-Barr Virus, Hepatitis B and Hepatitis C. Further, as the value of the RR increases, the quantity  $(RR - 1)/RR$  approaches a limit of 1, hence population attributable risk can be approximated using Equation 4.

$$\text{Equation 4: } PAR = p_c$$

Equation 4 was used for HPV and all cancer sites except cervical cancer, as mechanistic information suggests the presence of infection is likely to cause cancer for these infections. In situations where infection is considered a necessary cause of cancer (i.e. HPV and cervical cancer), 100% of cases were considered to be attributed to infection and therefore no population attributable risk estimations were done. Exposure-specific methods that will be described in more detail in individual manuscripts were used for air pollution, radon, and consumption of salt, dietary calcium and vitamin D. A summary of the method used for each exposure included in the full population attributable risk project is shown in Table 1.

To estimate 95% confidence intervals around population attributable risk estimates, Monte Carlo simulation methods were used wherein the relative risk estimates were drawn from a log normal

1  
2  
3 distribution, prevalence estimates were drawn from a binomial distribution, and incidence estimates were  
4 drawn from a Poisson distribution. Parameters for the distributions were defined by reported point  
5 estimates and confidence intervals. 10,000 samples were drawn and the 2.5th and 97.5th percentiles of the  
6 resulting population attributable risk distribution used as the lower and upper limits of a 95 % confidence  
7 interval. Similar techniques were used by two previous studies that estimated population attributable  
8 risk.[16,17] Wherever possible and appropriate, these estimations were performed for individual sex and  
9 age groups.  
10  
11

12  
13  
14  
15  
16  
17  
18  
19  
20  
21  
22  
23  
24  
25  
26  
27  
28  
29  
30  
31  
32  
33  
34  
35  
36  
37  
38  
39  
40  
41  
42  
43  
44  
45  
46  
47  
48  
49  
50  
51  
52  
53  
54  
55  
56  
57  
58  
59  
60

These different methods for estimating population attributable risks resulted in a set of proportions of cases by cancer site that can be attributed to these selected exposures. To estimate the specific number of cases of cancer in Alberta that could be attributed to individual exposures, we applied these proportions to the 2012 Alberta Cancer Registry cancer incidence data. Where possible, these estimations were also performed for age and sex specific groups.

## INTERPRETATION

The estimation of population attributable risks for cancer for modifiable lifestyle and environmental risk factors for Alberta will allow the proportion of cancer diagnosed in the province that is theoretically preventable to be quantified. This knowledge has implications for cancer prevention since it will identify the modifiable characteristics for which changes in the provincial risk profile are likely to have the greatest impact on Alberta's cancer burden. To our knowledge no systematic effort to quantify the cancer burden attributable to modifiable lifestyle and environmental risk factors has previously been conducted in Canada.

The project most comparable to ours was conducted by Parkin *et al.* to estimate population attributable risks for cancer risk factors in the United Kingdom in 2010.[13,18-32] The general approach used by Parkin *et al.*[13] has been adopted for our project and adapted for several of the exposure-specific methods to apply to the population of Alberta. These similarities will allow the results from our project and Parkin *et al.* to be directly comparable. Our analysis has also been informed by previous

1  
2  
3 studies of population attributable cancer risk for the individual exposures included in our project,  
4 particularly from studies conducted in Canada. In 2014, Brenner estimated that 3.5% and 7.9% of cancers  
5 in Canada could be attributed to overweight/obesity and physical inactivity respectively.[4] The methods  
6 we chose to assess the impact of these exposures in Alberta will be identical and thus our estimates will  
7 be directly comparable to those of the Brenner study. Cancer Care Ontario also published population  
8 attributable risk estimates to estimate the cancer burden attributable to tobacco [5], alcohol [33] and  
9 obesity [34] in Ontario and similar methods to those that we propose were used. Several studies have also  
10 attempted to quantify the proportion of lung cancer attributable to residential radon exposure for Canada  
11 as a whole [7, 8, 35], as well as for Ontario specifically.[6] Our estimation of the impact of residential  
12 radon on lung cancer incidence in Alberta uses the method developed by Brand *et al.* [7] and will use the  
13 same data source used in previous analyses for Canada [8] and Ontario.[6] The implementation of  
14 methods that have previously been used to evaluate population attributable cancer risks in general [13]  
15 and for individual exposures [4-8,33,34,35] makes our estimates directly comparable to these previous  
16 efforts. Given that no previous estimates of the population attributable cancer risk in Alberta have been  
17 conducted, the ability to compare our estimates to others, particularly in a Canadian context, will assist in  
18 interpreting our findings.  
19  
20  
21  
22  
23  
24  
25  
26  
27  
28  
29  
30  
31  
32  
33  
34  
35  
36  
37  
38  
39

#### 40 **Limitations**

41  
42 While the systematic evaluation of the population attributable cancer in Alberta described in our  
43 protocol will provide novel information about the main causes of cancer in the province, there are some  
44 limitations to our approach. First, our protocol does not consider the influence of exposures that occur in  
45 an occupational setting in order to prevent duplication of work currently being completed by the  
46 Occupational Cancer Research Centre at Cancer Care Ontario concerning the burden of occupational  
47 cancer in Canada. [36] Further, the accuracy of the estimates of population attributable risk that will be  
48 produced will necessarily be limited by the extent to which the prevalence estimates for individual  
49 exposures are representative of the true exposure levels in Alberta. For example, for several dietary  
50  
51  
52  
53  
54  
55  
56  
57  
58  
59  
60

1  
2  
3 exposures, exposure prevalence was estimated using data from Alberta's Tomorrow Project, a population-  
4 based cohort study.[37] Participants in Alberta's Tomorrow Project are volunteers [37] and the potential  
5 for volunteer bias (systematic differences between those who volunteer for the study and those who do  
6 not) will need to be considered when evaluating whether the prevalence of individual exposures in the  
7 cohort is representative of exposure levels in the general Alberta population.  
8  
9

10  
11  
12 Our analyses are further limited by the fact that we were unable to account for potential  
13 interactions between risk factors when quantifying population attributable risks. As many cancers have  
14 multiple causes, it is reasonable to suspect some cancer cases may have been caused by interactions  
15 between risk factors investigated in our project. In our analysis each risk factor was considered  
16 individually, such that cancers that may have been the result of a combination of risk factors would have  
17 been counted twice. However, in order to accurately account for these potential interactions in our  
18 population attributable risk estimates, exposure data with estimations of the joint distribution of risk  
19 factors that may interact are required and these were not consistently available for Alberta across the  
20 range of exposures included in our project. We also estimated that the period between exposure and  
21 cancer incidence (referred to in the analyses as latency period) would be the midpoint of observed follow-  
22 up times between exposure assessment and cancer incidence in large cohort studies. We did not conduct  
23 subsequent sensitivity analyses to examine the impact of this choice by modeling the extent to which  
24 changes in exposure prevalence across a range of different latency periods would have influenced  
25 estimates of population attributable risk.  
26  
27  
28  
29  
30  
31  
32  
33  
34  
35  
36  
37  
38  
39  
40  
41  
42  
43

44 Through a national collaborative partnership project funded by the Canadian Cancer Society  
45 (Grant Number 703106) we will be conducting a similar series of estimations at the national level in  
46 Canada. We will be working to address the methodological limitations listed above with a series of  
47 statistical advancements that will include joint risk factor considerations and projection of future  
48 avoidable disease burden.  
49  
50  
51  
52  
53  
54  
55  
56

## 57 **Conclusion**

58  
59  
60

1  
2  
3 The results from the analyses described in this manuscript will estimate population attributable  
4 cancer risks for modifiable lifestyle and environmental risk factors for cancer in Alberta. Each of the  
5 exposure-specific manuscripts outlined in Table 2 will follow in this journal. The data produced by this  
6 project will provide important information concerning which known cancer risk factors are responsible  
7 for the largest proportions of cancer in Alberta and could inform future cancer prevention strategies.  
8  
9  
10  
11  
12  
13  
14  
15  
16  
17  
18  
19  
20  
21  
22  
23  
24  
25  
26  
27  
28  
29  
30  
31  
32  
33  
34  
35  
36  
37  
38  
39

#### 40 **ACKNOWLEDGEMENTS**

41  
42 This project was funded by the Alberta Cancer Prevention Legacy Fund. Dr Christine Friedenreich is  
43 supported by an Alberta Innovates-Health Solutions Health Senior Scholar Award and the Alberta Cancer  
44 Foundation Weekend to End Women's Cancers Breast Cancer Chair at the University of Calgary. Dr.  
45 Darren Brenner is supported by a Career Development Award in Prevention from the Canadian Cancer  
46 Society Research Institute. We gratefully acknowledge Dr. Laura McDougall from the Alberta Cancer  
47 Prevention Legacy Fund for her support and guidance. We also thank Bethany Kaposhi and Lorraine  
48 Shack from the Alberta Cancer Registry for providing cancer incidence data, the department of Data  
49  
50  
51  
52  
53  
54  
55  
56  
57  
58  
59  
60

Integration, Measurement and Reporting at Alberta Health Services for access to CCHS data and Eileen Shaw for critical review of this manuscript.

Confidential

1  
2  
3  
4  
5  
6  
7  
8  
9  
10  
11  
12  
13  
14  
15  
16  
17  
18  
19  
20  
21  
22  
23  
24  
25  
26  
27  
28  
29  
30  
31  
32  
33  
34  
35  
36  
37  
38  
39  
40  
41  
42  
43  
44  
45  
46  
47  
48  
49  
50  
51  
52  
53  
54  
55  
56  
57  
58  
59  
60

## REFERENCES

1. Walter SD. Local estimates of population attributable risk. *J Clin Epidemiol*. 2010;63(1):85-93.
2. Orenstein M, Chen J, Dall T, Curley P. The economic burden of occupational cancers in Alberta. Calgary: 2009.
3. Neutel CI, Morrison H. Could recent decreases in breast cancer incidence really be due to lower HRT use? Trends in attributable risk for modifiable breast cancer risk factors in Canadian women. *Can J Public Health*. 2010;101(5):405-9.
4. Brenner DR. Cancer incidence due to excess body weight and leisure-time physical inactivity in Canada: Implications for prevention. *Preventive Medicine*. 2014;66(0):131-9.
5. Cancer Care Ontario. Cancer Risk Factors in Ontario: Tobacco. Toronto, Ontario: 2014.
6. Peterson E, Aker A, Kim J, Li Y, Brand K, Copes R. Lung cancer risk from radon in Ontario, Canada: how many lung cancers can we prevent? *Cancer Causes & Control*. 2013;24(11):2013-20.
7. Brand KP, Zielinski JM, Krewski D. Residential Radon in Canada: An Uncertainty Analysis of Population and Individual Lung Cancer Risk. *Risk Analysis*. 2005;25(2):253-69.
8. Chen J, Moir D, Whyte J. Canadian population risk of radon induced lung cancer: a re-assessment based on the recent cross-Canada radon survey. *Radiation Protection Dosimetry*. 2012;152(1-3):9-13.
9. Cancer Care Ontario. Cancer Risk Factors in Ontario: Evidence Summary. Toronto, Canada: 2013.
10. Research WCRFAIfC. Food, Nutrition, Physical Activity, and the Prevention of Cancer: a Global Perspective. Washington, DC: AICR, 2007.
11. Murray CJ, Ezzati M, Lopez AD, Rodgers A, Vander Hoorn S. Comparative quantification of health risks conceptual framework and methodological issues. *Popul Health Metr*. 2003;1(1):1.
12. Levin M. The occurrence of lung cancer in man. *Acta Unio Int Contra Cancrum*. 1953;9:531-41.
13. Parkin DM. 1. The fraction of cancer attributable to lifestyle and environmental factors in the UK in 2010. *Br J Cancer*. 2011;105 Suppl 2:S2-5.
14. de Martel C, Ferlay J, Franceschi S, Vignat J, Bray F, Forman D, et al. Global burden of cancers attributable to infections in 2008: a review and synthetic analysis. *The Lancet Oncology*. 2012;13(6):607-15.
15. Miettinen OS. Proportion of disease caused or prevented by a given exposure, trait or intervention. *American Journal of Epidemiology*. 1974;99(5):325-32.



16. Renehan AG, Soerjomataram I, Tyson M, Egger M, Zwahlen M, Coebergh JW, et al. Incident cancer burden attributable to excess body mass index in 30 European countries. *International Journal of Cancer*. 2010;126(3):692-702.
17. Lee IM, Shiroma EJ, Lobelo F, Puska P, Blair SN, Katzmarzyk PT. Effect of physical inactivity on major non-communicable diseases worldwide: an analysis of burden of disease and life expectancy. *The Lancet*. 2012; 380(9838):219-29.
18. Parkin DM. 2. Tobacco-attributable cancer burden in the UK in 2010. *Br J Cancer*. 2011;105(S2):S6-S13.
19. Parkin D. 3. Cancers attributable to consumption of alcohol in the UK in 2010. *British Journal of Cancer*. 2011;105:S14-S8.
20. Parkin DM, Boyd L. 4. Cancers attributable to dietary factors in the UK in 2010. *Br J Cancer*. 2011;105(S2):S19-S23.
21. Parkin DM. 5. Cancers attributable to dietary factors in the UK in 2010. *Br J Cancer*. 2011;105(s2):s24-S6.
22. Parkin DM, Boyd L. 6. Cancers attributable to dietary factors in the UK in 2010. *Br J Cancer*. 2011;105(S2):S27-S30.
23. Parkin DM. 7. Cancers attributable to dietary factors in the UK in 2010. *Br J Cancer*. 2011;105(S2):S31-S3.
24. Parkin DM, Boyd L. 8. Cancers attributable to overweight and obesity in the UK in 2010. *Br J Cancer*. 2011;105(S2):S34-S7.
25. Parkin DM. 9. Cancers attributable to inadequate physical exercise in the UK in 2010. *Br J Cancer*. 2011;105(S2):S38-S41.
26. Parkin DM. 10. Cancers attributable to exposure to hormones in the UK in 2010. *Br J Cancer*. 2011;105(S2):S42-S8.
27. Parkin DM. 11. Cancers attributable to infection in the UK in 2010. *Br J Cancer*. 2011;105(S2):S49-S56.
28. Parkin DM, Darby SC. 12. Cancers in 2010 attributable to ionising radiation exposure in the UK. *Br J Cancer*. 2011;105(S2):S57-S65.
29. Parkin DM, Mesher D, Sasieni P. 13. Cancers attributable to solar (ultraviolet) radiation exposure in the UK in 2010. *Br J Cancer*. 2011;105(S2):S66-S9.
30. Parkin DM. 14. Cancers attributable to occupational exposures in the UK in 2010. *Br J Cancer*. 2011;105(S2):S70-S2.
31. Parkin DM. 15. Cancers attributable to reproductive factors in the UK in 2010. *Br J Cancer*. 2011;105(S2):S73-S6.

- 1
- 2
- 3 32. Parkin DM, Boyd L, Walker LC. 16. The fraction of cancer attributable to lifestyle and
- 4 environmental factors in the UK in 2010. *Br J Cancer*. 2011;105 Suppl 2:S77-81.
- 5
- 6
- 7 33. Cancer Care Ontario. *Cancer Risk Factors in Ontario: Alcohol*. Toronto, Ontario: 2014.
- 8
- 9 34. Cancer Care Ontario. *Cancer Risk Factors in Ontario: Healthy Weights, Healthy Eating and*
- 10 *Active Living*. Toronto, Ontario: 2015.
- 11
- 12 35. Chen J, Tracy BL. Canadian Population Risk of Radon Induced Lung Cancer. *Canadian Journal*
- 13 *of Respiratory Therapy*. 2005;41:19-27.
- 14
- 15
- 16 36. Jardine K, Pahwa M, Kramer D, Demers P. *Preventing the Burden of Occupational Cancer in*
- 17 *Canada: Stakeholder Meeting Summary*. Toronto, Ontario: 2015.
- 18
- 19 37. Bryant H, Robson PJ, Ullman R, Freidenreich C, Dawe U. Population-based cohort development
- 20 *in Alberta, Canada: a feasibility study*. *Chronic Diseases in Canada*. 2006;27(2):51 - 9.
- 21
- 22
- 23
- 24
- 25
- 26
- 27
- 28
- 29
- 30
- 31
- 32
- 33
- 34
- 35
- 36
- 37
- 38
- 39
- 40
- 41
- 42
- 43
- 44
- 45
- 46
- 47
- 48
- 49
- 50
- 51
- 52
- 53
- 54
- 55
- 56
- 57
- 58
- 59
- 60

Confidential

**Table 1.** The population attributable risk estimation methods employed for the for individual exposures of interest in this Series

| Formula for PAR Estimation                                                                                                                                                                           | Exposure                                                                                                                                                                                                                                                                                                                                                                         |
|------------------------------------------------------------------------------------------------------------------------------------------------------------------------------------------------------|----------------------------------------------------------------------------------------------------------------------------------------------------------------------------------------------------------------------------------------------------------------------------------------------------------------------------------------------------------------------------------|
| $\text{Formula 1: } PAR = \frac{Pe (RR - 1)}{1 + [Pe (RR - 1)]}$                                                                                                                                     | <ul style="list-style-type: none"> <li>• tobacco (passive exposure)</li> <li>• UV exposure</li> <li>• disinfection by-products</li> <li>• low vitamin D</li> <li>• high salt intake</li> <li>• low dietary calcium intake</li> </ul>                                                                                                                                             |
| $\text{Formula 2: } PAR = p_c \frac{(RR - 1)}{RR}$                                                                                                                                                   | <ul style="list-style-type: none"> <li>• <i>Helicobacter Pylori</i></li> <li>• EBV</li> <li>• hepatitis B</li> <li>• hepatitis C</li> </ul>                                                                                                                                                                                                                                      |
| $\text{Formula 3: } PAR = P_c$                                                                                                                                                                       | <ul style="list-style-type: none"> <li>• HPV for all cancer sites except the cervix</li> </ul>                                                                                                                                                                                                                                                                                   |
| $\text{Formula 4: } PAF = \frac{(p_{e1} \times ERR_1) + (p_{e2} \times ERR_2) + \dots + (p_{ex} \times ERR_x)}{1 + ((p_{e1} \times ERR_1) + (p_{e2} \times ERR_2) + \dots + (p_{ex} \times ERR_x))}$ | <ul style="list-style-type: none"> <li>• Tobacco (active exposure)</li> <li>• oral contraceptives</li> <li>• hormone replacement therapy</li> <li>• overweight/obesity</li> <li>• low fruit and vegetable intake</li> <li>• red meat/processed meat intake</li> <li>• high alcohol intake</li> <li>• low dietary fibre intake</li> <li>• physical activity/inactivity</li> </ul> |
| Individualized Methods                                                                                                                                                                               | <ul style="list-style-type: none"> <li>• air pollution</li> <li>• radon</li> <li>• insufficient fruit and vegetable intake</li> <li>• red/processed meat intake</li> <li>• insufficient fibre intake</li> <li>• alcohol consumption</li> </ul>                                                                                                                                   |

**Table 2:** Exposure and Cancer Site Associations of Interest to be Included in this Project

| Manuscript | Exposure                                       | Cancer types consistently associated with exposure                                                                                                                                           |
|------------|------------------------------------------------|----------------------------------------------------------------------------------------------------------------------------------------------------------------------------------------------|
| 1          | Active Tobacco Exposure                        | Lung<br>Oral cavity and pharynx<br>Oesophagus<br>Stomach<br>Liver<br>Pancreas<br>Colorectum<br>Larynx<br>Cervix<br>Ovarian (mucinous)<br>Urinary bladder<br>Kidney<br>Acute myeloid leukemia |
|            | Passive Tobacco Exposure                       | Lung<br>Oral cavity and pharynx<br>Oesophagus<br>Larynx                                                                                                                                      |
| 2          | High Alcohol Intake                            | Mouth<br>Pharynx<br>Larynx<br>Liver<br>Colorectum<br>Breast (pre & post-menopause)                                                                                                           |
| 3          | Overweight/Obesity<br>( $>25 \text{ kg/m}^2$ ) | Breast (post-menopausal)<br>Colorectum<br>Oesophagus (adenocarcinoma)<br>Kidney<br>Endometrium<br>Gall bladder<br>Pancreas                                                                   |
| 4          | Physical inactivity                            | Breast (post-menopausal)<br>Colorectum<br>Endometrium<br>Lung<br>Ovary<br>Prostate                                                                                                           |
| 5          | Low vegetable intake<br>(non-starchy)          | Oral cavity and pharynx<br>Oesophagus                                                                                                                                                        |

|    |                                                                                                                                                        |                                                                                                                                                                                         |
|----|--------------------------------------------------------------------------------------------------------------------------------------------------------|-----------------------------------------------------------------------------------------------------------------------------------------------------------------------------------------|
|    | Low fruit intake                                                                                                                                       | Stomach<br>Larynx<br>Oral cavity and pharynx<br>Oesophagus<br>Stomach<br>Larynx<br>Lung                                                                                                 |
| 6  | High red meat intake<br>High process meat intake                                                                                                       | Colorectum<br>Colorectum                                                                                                                                                                |
| 7  | Low fibre intake                                                                                                                                       | Colorectum                                                                                                                                                                              |
| 8  | Low vitamin D<br>High salt intake<br>Low dietary calcium intake                                                                                        | Colorectum<br>Breast<br>Stomach<br>Colorectum                                                                                                                                           |
| 9  | <b>Hormone therapies</b><br>Oral contraceptive use<br><br>Hormone Replacement Therapy                                                                  | Breast<br>Endometrium<br>Ovary<br>Breast<br>Endometrium<br>Ovary                                                                                                                        |
| 10 | <b>Infectious agents</b><br>Human papillomavirus<br><br><i>Helicobacter Pylori</i><br>Epstein Barr Virus<br><br>Hepatitis B Virus<br>Hepatitis C Virus | Cervix<br>Vagina<br>Penis<br>Anus<br>Vulva<br>Oropharynx<br>Stomach<br>Non-Hodgkin lymphoma<br><br>Hodgkin lymphoma<br>Burkitt's lymphoma<br>Nasopharyngeal carcinoma<br>Liver<br>Liver |
| 11 | UV Exposure                                                                                                                                            | Melanoma                                                                                                                                                                                |
| 12 | Radon                                                                                                                                                  | Lung                                                                                                                                                                                    |
| 13 | Air pollution<br>PM 2.5                                                                                                                                | Lung                                                                                                                                                                                    |

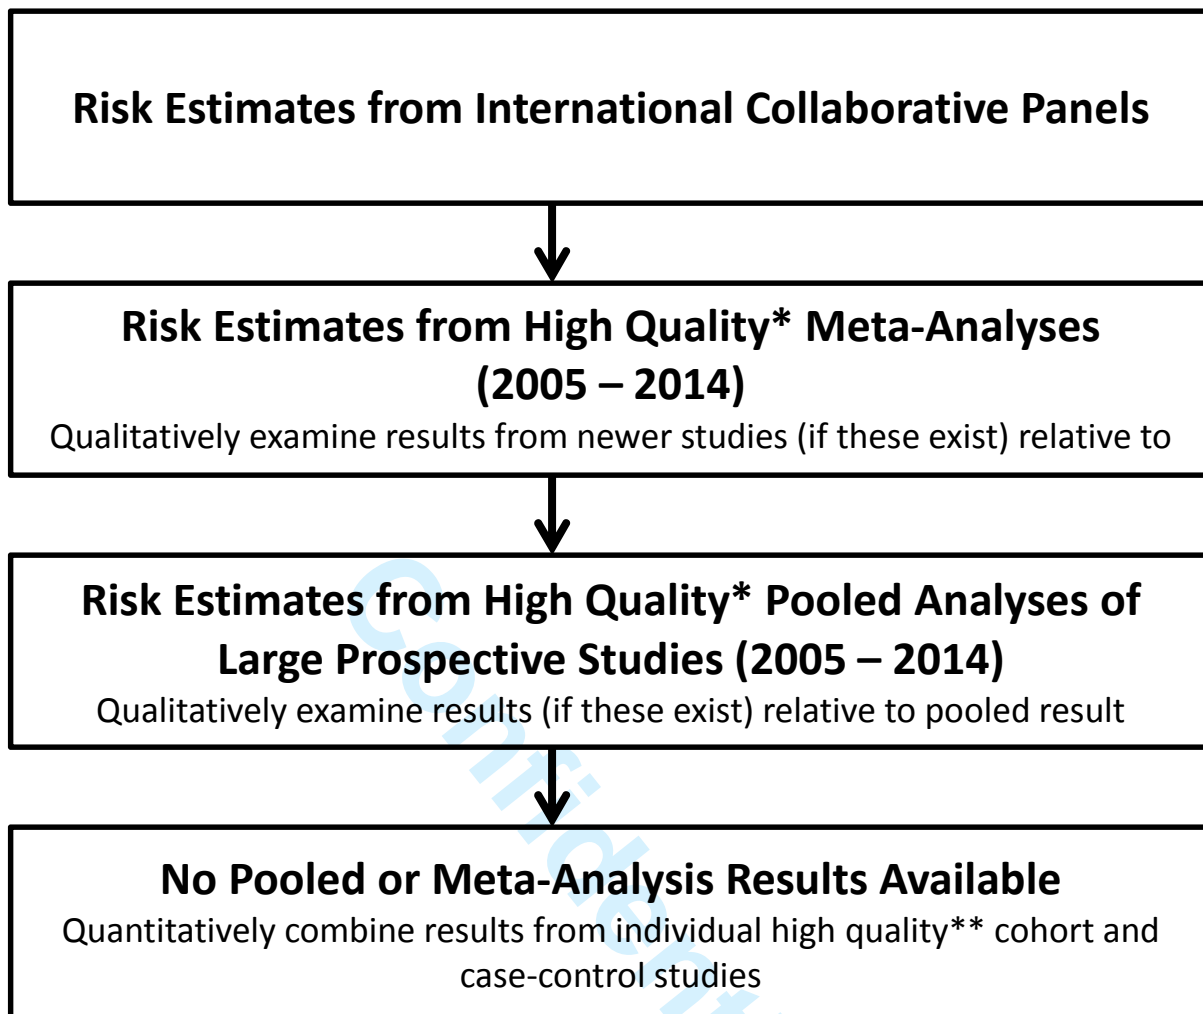

\*Quality determined using STrengthening the Reporting of OBservational studies in Epidemiology (STROBE) guidelines for cohort and case-control studies and Meta-analysis Of Observational Studies in Epidemiology (MOOSE) guidelines for meta-analysis

**Figure 1.** The process flow used for selecting risk estimates used in this project.

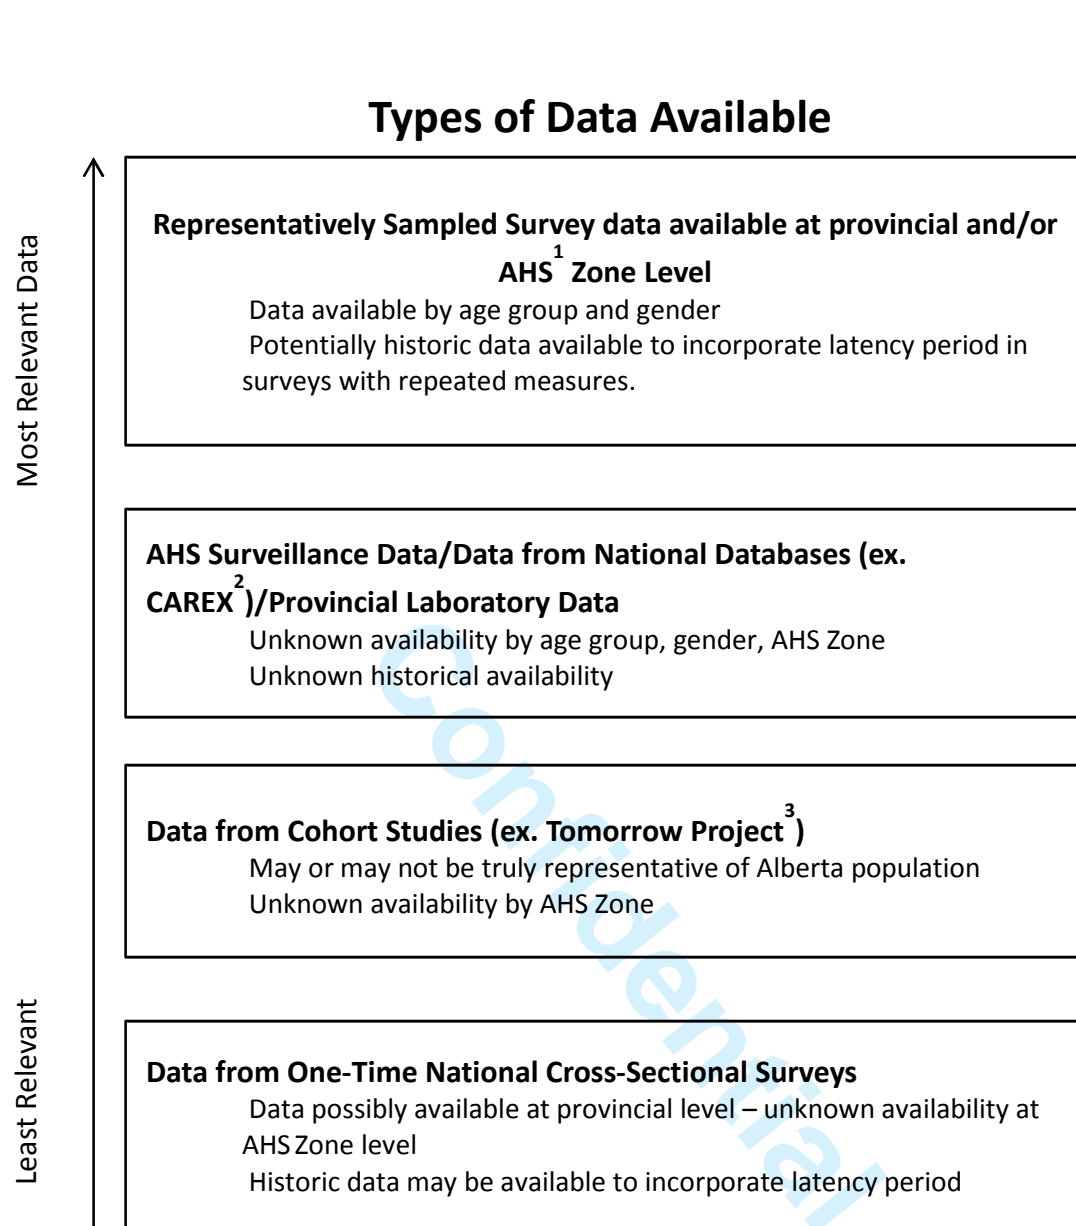

<sup>1</sup> Alberta Health Services

<sup>2</sup> CARcinogen Exposure (CAREX)– a multi-institution research project dedicated to generating evidence based carcinogen surveillance in Canada ([www.carexcanada.ca](http://www.carexcanada.ca))

<sup>3</sup> The Tomorrow Project is a large prospective cohort study currently being conducted in Alberta to study health outcomes including cancer. The project, which began in 2000, is recruiting adults aged 35 – 69 who will be followed for up to 50 years.

**Figure 2.** The hierarchy for selection of exposure prevalence estimates

1  
2  
3  
4  
5  
6  
7  
8  
9  
10  
11  
12  
13  
14  
15  
16  
17  
18  
19  
20  
21  
22  
23  
24  
25  
26  
27  
28  
29  
30  
31  
32  
33  
34  
35  
36  
37  
38  
39  
40  
41  
42  
43  
44  
45  
46  
47  
48  
49  
50  
51  
52  
53  
54  
55  
56  
57  
58  
59  
60

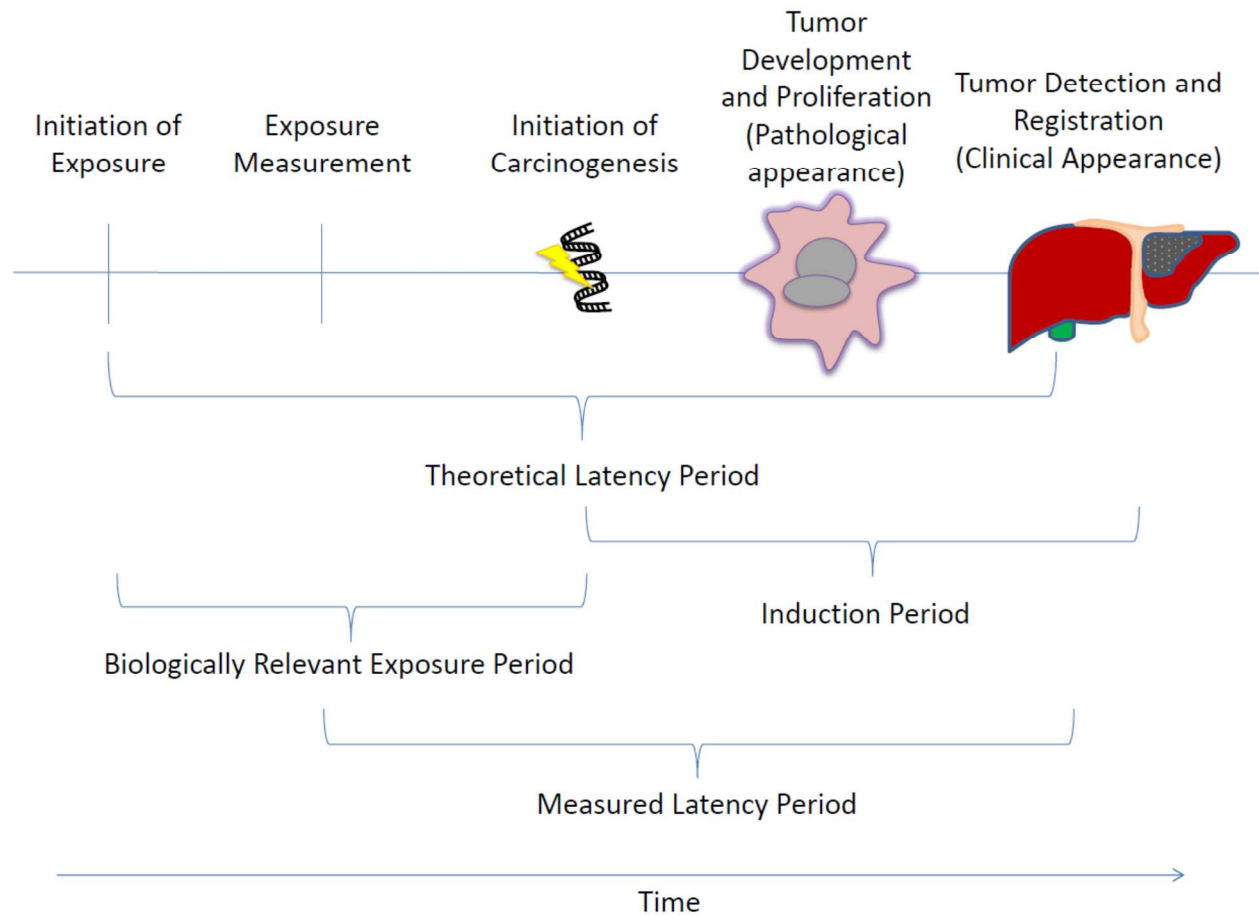

**Figure 3.** Proposed model of carcinogenesis related to the adverse exposure of interest. The measured latency period is referred to as the latency period for the purposes of estimating population attributable cancer risks in Alberta.
